# Supplementary material
Source: Springer Nature journal article supplement (https://www.springermedizin.de/resource/supplementary/12936_2007_632_MOESM1_ESM.pdf/9547864)

|                               |   |   |   |   |   |
|-------------------------------|---|---|---|---|---|
| Opsonized nonparasitized RBCs | - | + | - | - | - |
| Trophozoites                  | - | - | + | - | - |
| Latex particles               | - | - | - | + | - |
| HZ                            | - | - | - | - | + |

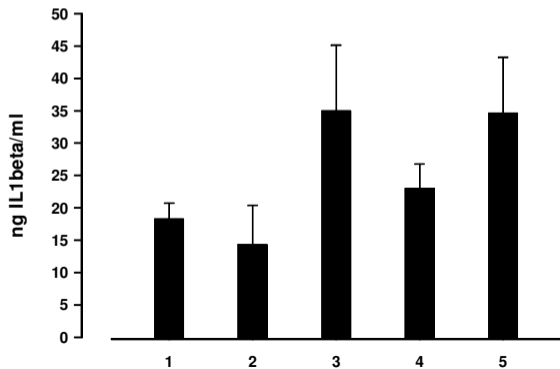

Supplement: MOESM1 [file 9547864]
